# Supplementary material
Source: PubMed Central journal article supplement (PMC8101952)
Supplement: NIHMS1066974-supplement-SI.pdf [file NIHMS1066974-supplement-SI.pdf]

**Supporting Information for**

**Cowpea Mosaic Virus Promotes the Anti-tumor Activity and Immune Memory in a  
Mouse Ovarian Tumor Model**

*Chao Wang, Steven N. Fiering, and Nicole F. Steinmetz\**

Dr. C. Wang and Dr. NF. Steinmetz

Department of NanoEngineering, University of California, San Diego, La Jolla, CA  
92093, United States

Department of Biomedical Engineering, Case Western Reserve University School of  
Medicine, Cleveland, OH 44106, United States

Dr. NF. Steinmetz

Department of Radiology, Moores Cancer Center, Bioengineering, University of  
California, San Diego, 9500 Gilman Dr., La Jolla, CA 92093-0448, United States

Email: [nsteinmetz@ucsd.edu](mailto:nsteinmetz@ucsd.edu)

Dr. SN. Fiering

Department of Microbiology and Immunology and Norris Cotton Cancer Center,  
Dartmouth University, Lebanon, NH 03756, United States

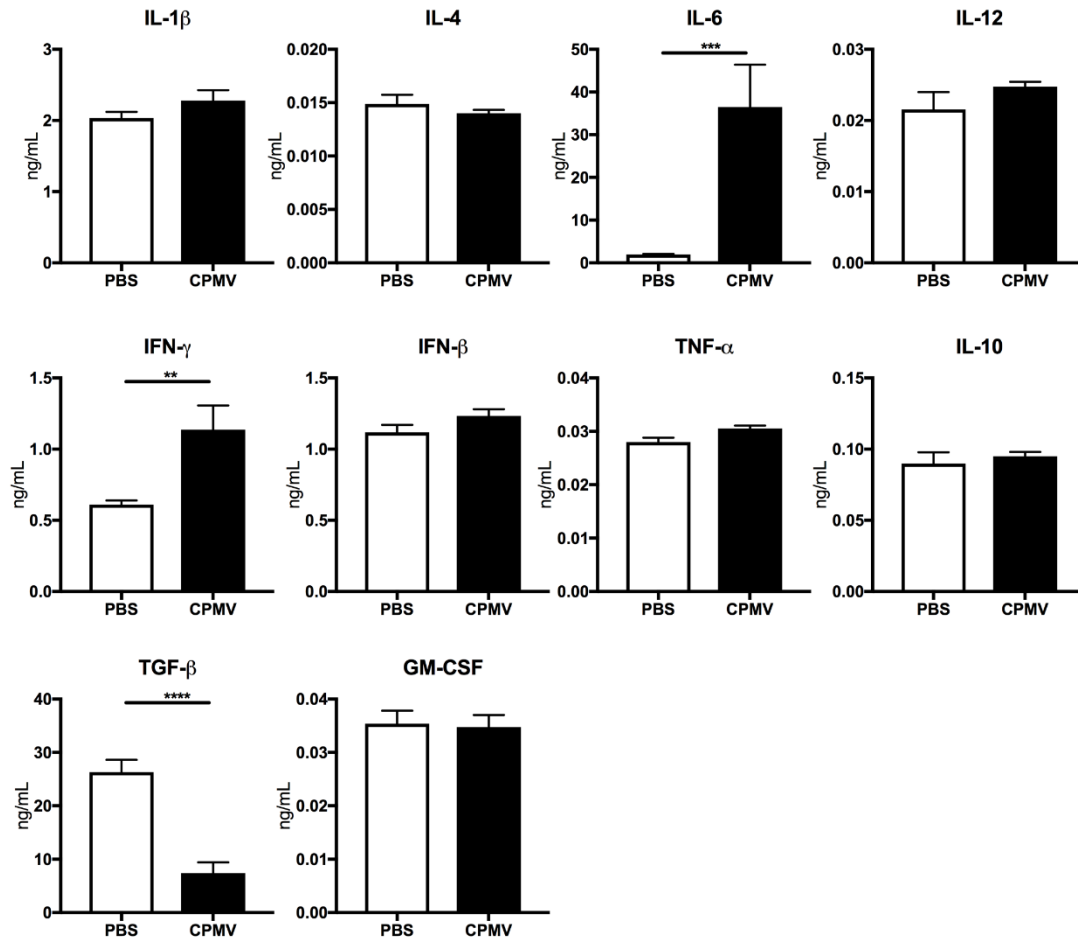

**Figure S1.** Cytokine secretion from peritoneal cavity wash cells after *ex vivo* CPMV stimulation. The levels of IL-1 $\beta$ , IL-4, IL-6, IL-10, IL-12, TNF- $\alpha$ , TGF- $\beta$ , GM-CSF, IFN- $\beta$ , and IFN- $\gamma$  were measured. Peritoneal cavity wash cells were collected on day 35 post-inoculation. Data are means  $\pm$  SEM (n=3). Statistical significance was calculated using an unpaired t-test (\*\*p<0.01, \*\*\*p<0.0005, \*\*\*\*p<0.0001).

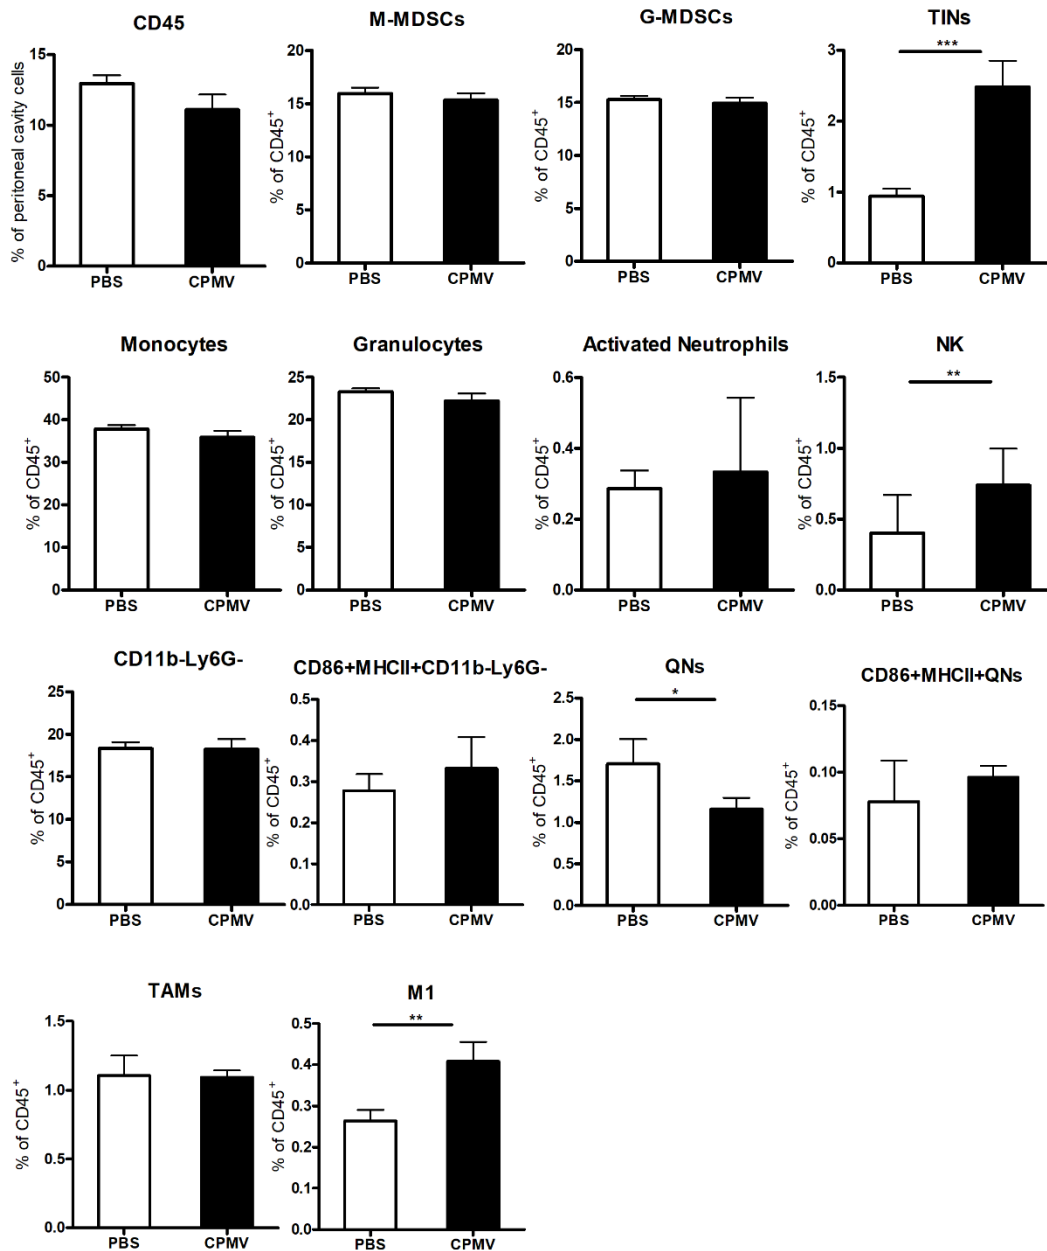

**Figure S2.** Innate immune cell profile from peritoneal cavity wash cells after *ex vivo* CPMV stimulation. Data are means  $\pm$  SEM (n=3). Statistical significance was calculated using an unpaired t-test (\*\*p<0.01, \*\*\*p<0.0005, \*\*\*\*p<0.0001).

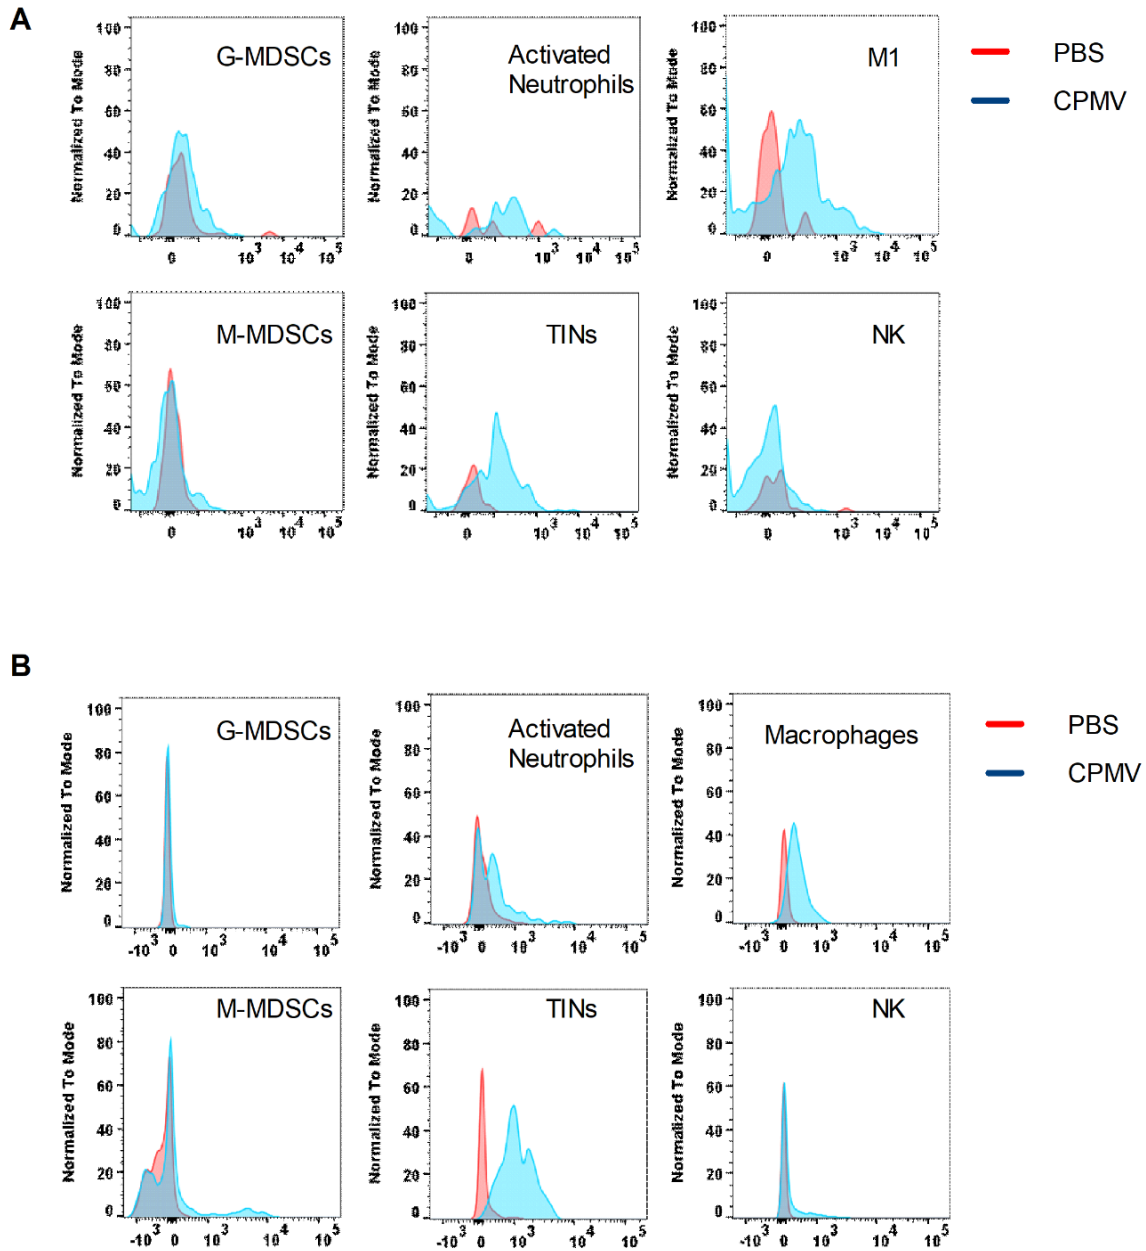

**Figure S3.** Uptake of Cy5-labeled CPMV particles. **A**, Cy5-labeled CPMV particles were injected i.p. into tumor-bearing mice and a peritoneal wash was collected 48 h later. **B**, CPMV uptake after *ex vivo* stimulation of splenocytes for 2 h.

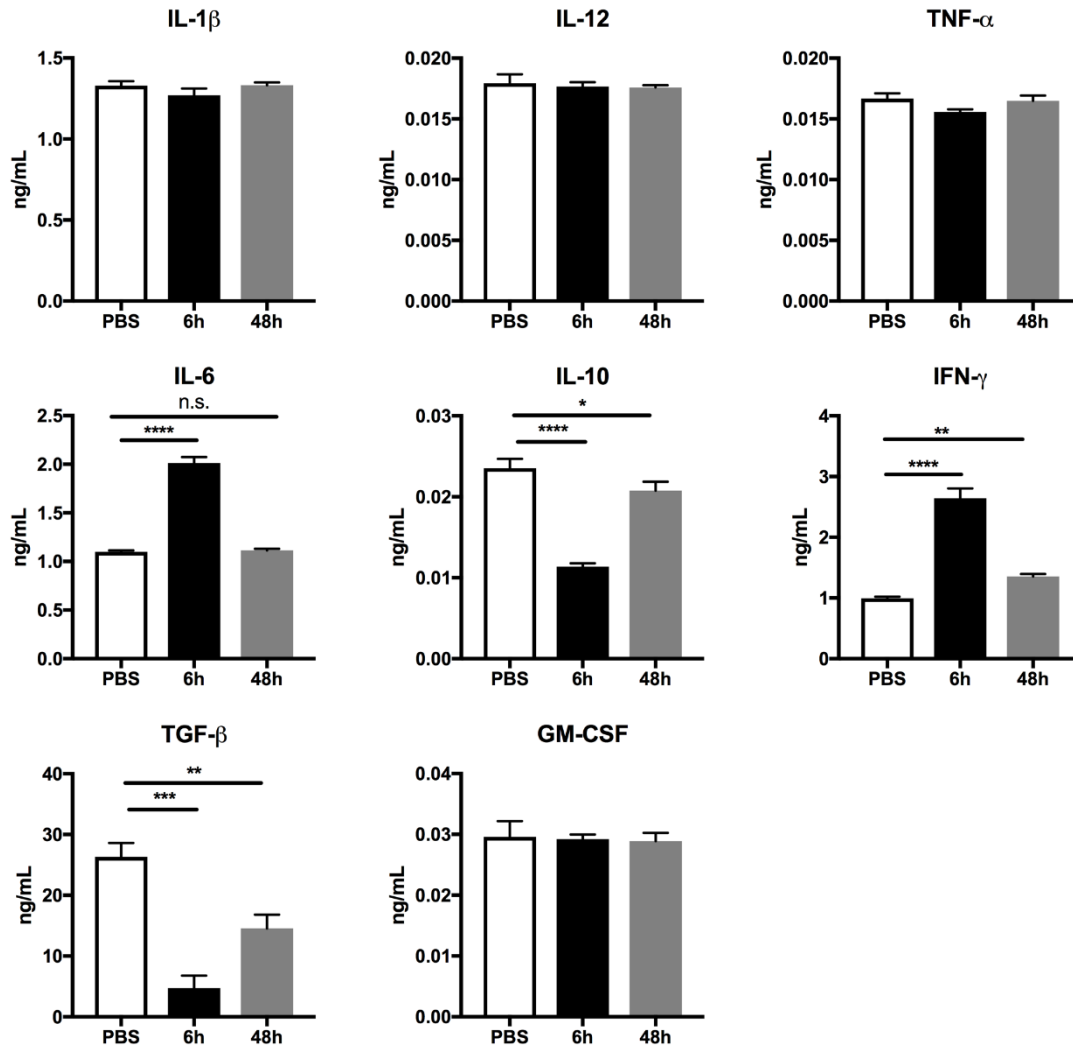

**Figure S4.** Cytokine levels in the peritoneal cavity wash supernatant, collected 6 or 48 h after the final CPMV treatment. The levels of IL-6, IL-12, TNF- $\alpha$ , IL-10, TGF- $\beta$ , IL-1 $\beta$ , GM-CSF and IFN- $\gamma$  were measured. Data are means  $\pm$  SEM (n=3). Statistical significance was calculated by two-way ANOVA with the Holm-Sidak test (\* $p$ <0.05, \*\* $p$ <0.01, \*\*\* $p$ <0.0005; \*\*\*\* $p$ <0.0001).

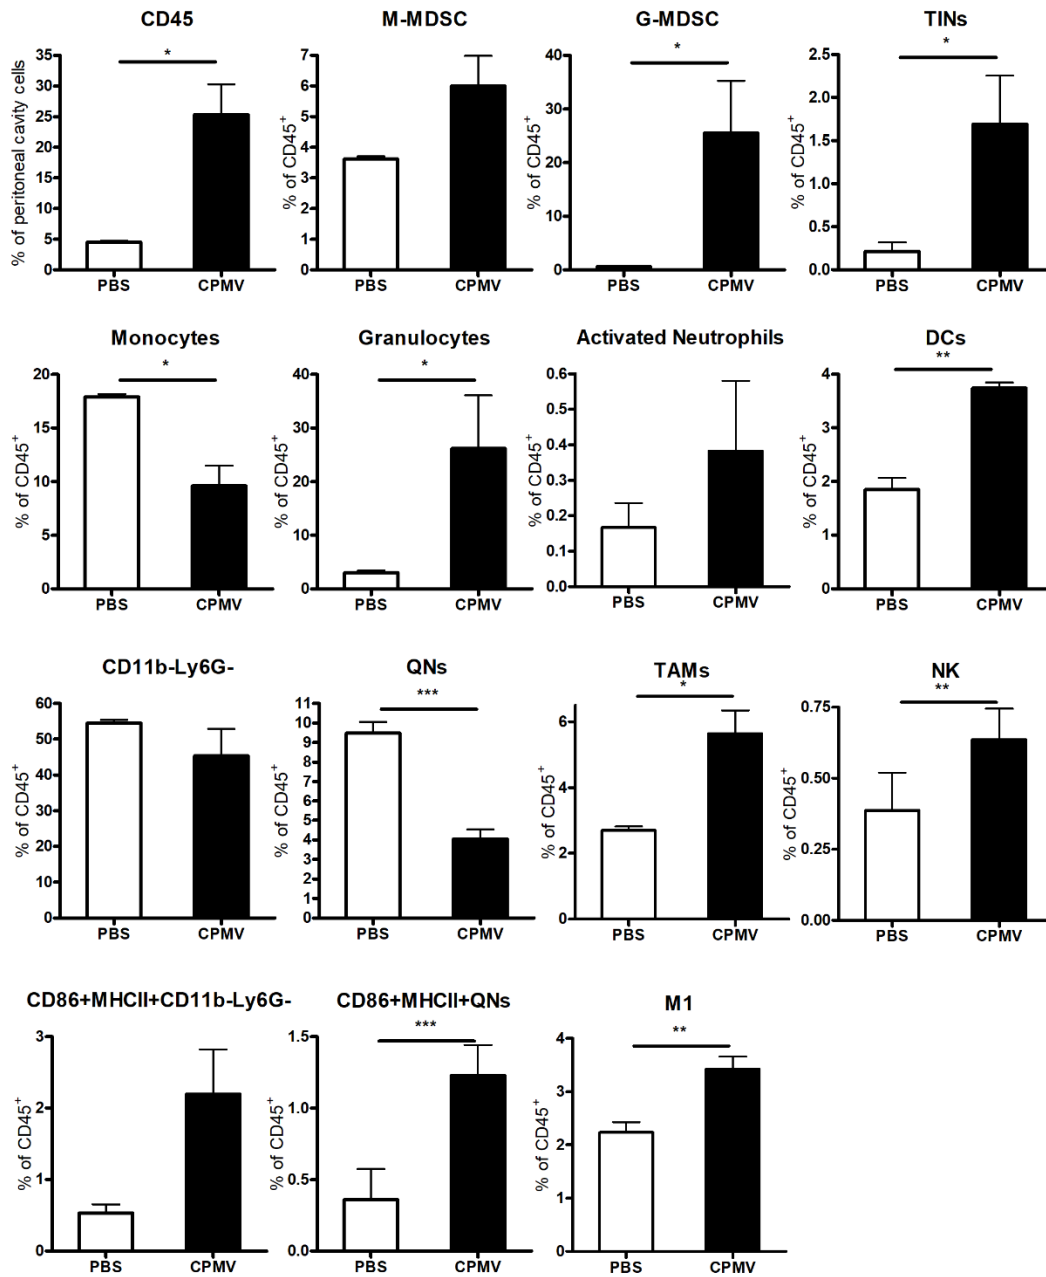

**Figure S5.** Innate immune cell profile in the peritoneal cavity wash collected 6 h after the final CPMV treatment. Statistical significance was calculated using an unpaired t-test (\* $p < 0.05$ , \*\* $p < 0.01$ , \*\*\* $p < 0.0005$ ).

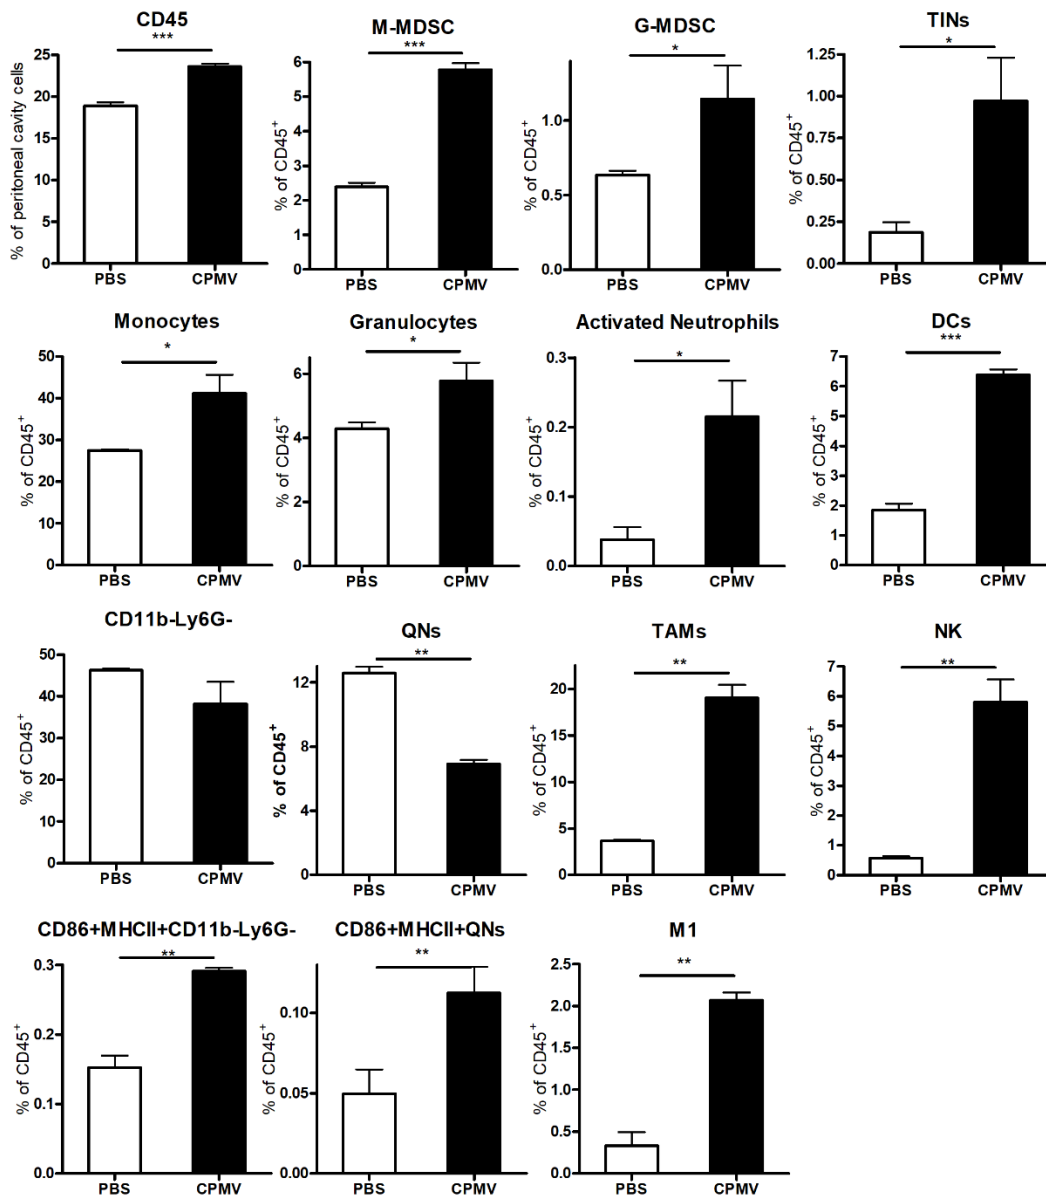

**Figure S6.** Innate immune cell profile in the peritoneal cavity wash collected 48 h after the final CPMV treatment. Statistical significance was calculated using an unpaired t-test (\* $p < 0.05$ , \*\* $p < 0.01$ , \*\*\* $p < 0.0005$ ).

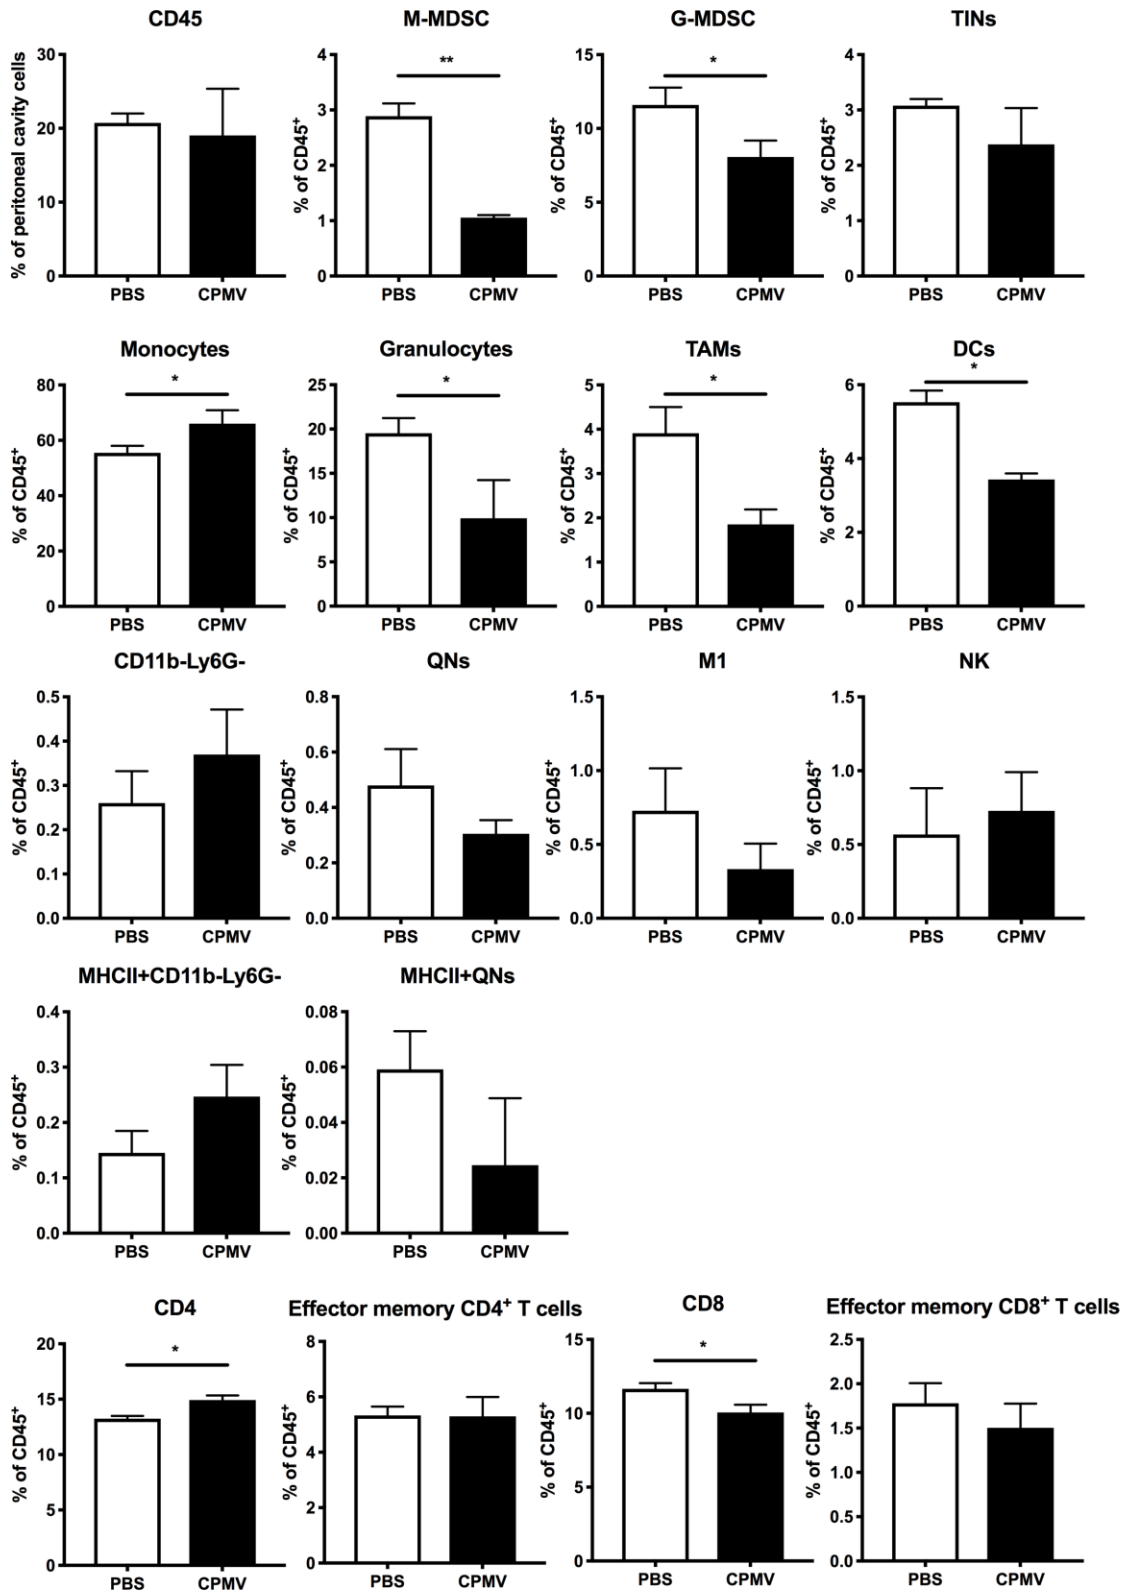



**Figure S7.** Innate and adaptive immune cell profiles of splenocytes collected 6 h after the final CPMV treatment. Statistical significance was calculated using an unpaired t-test (\* $p < 0.05$ , \*\* $p < 0.01$ , \*\*\* $p < 0.0005$ ).

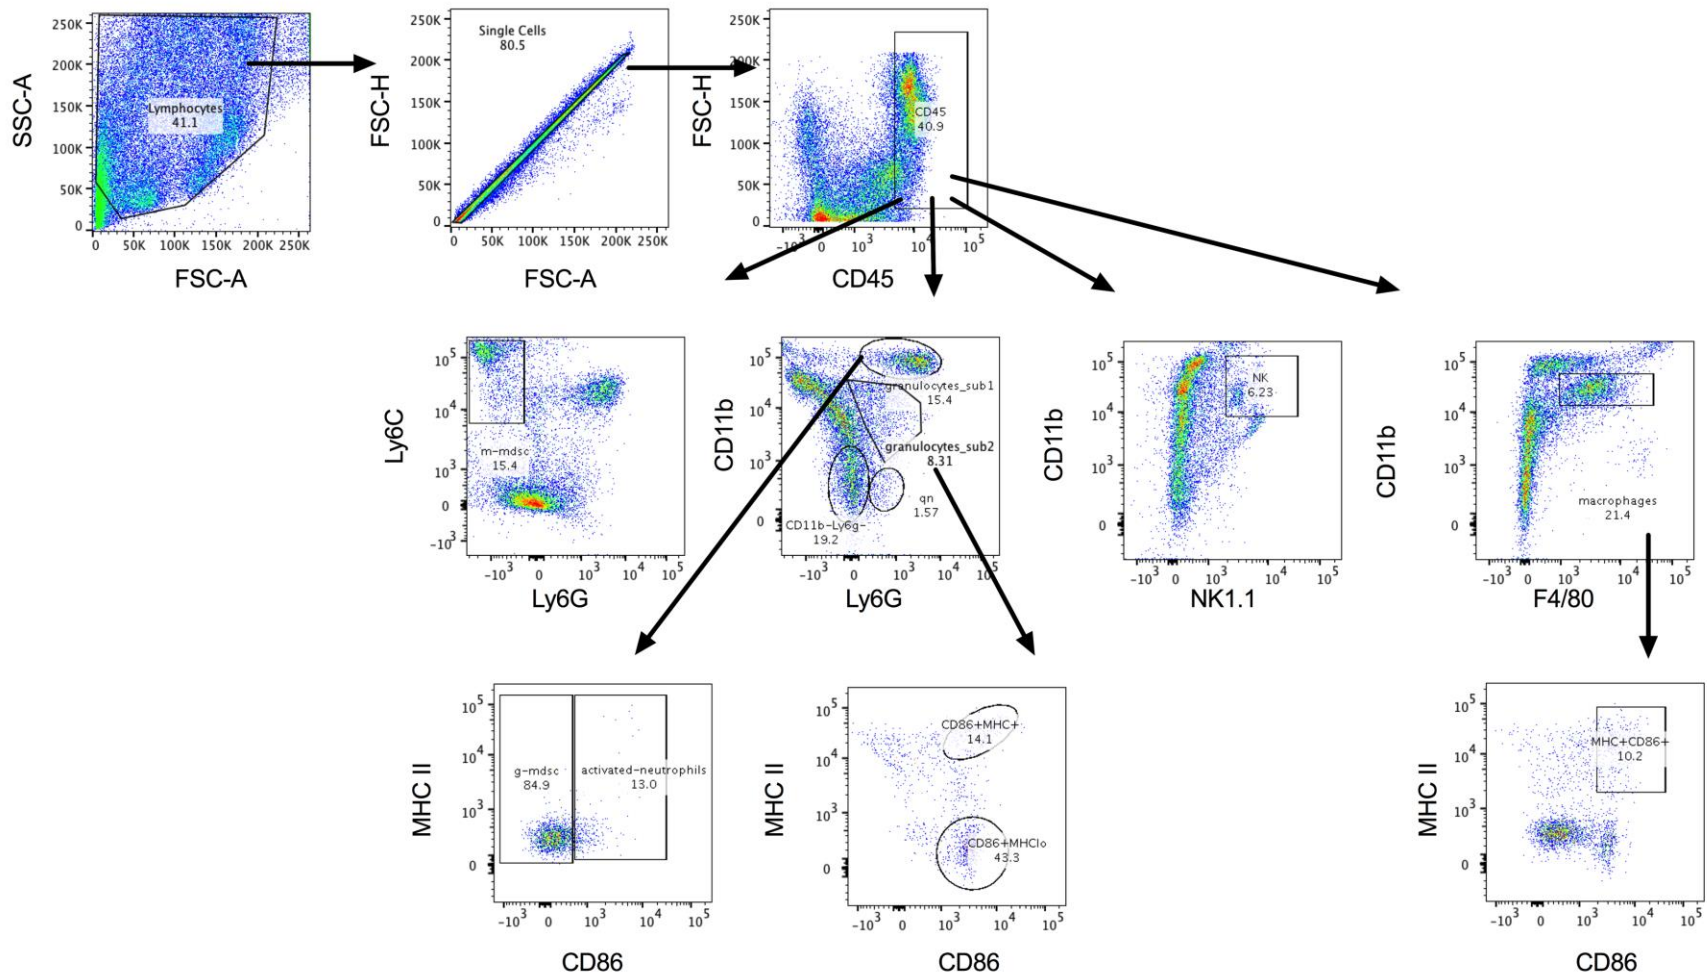

**Figure S8.** Gating strategy of innate immune cells profiles in tumor-bearing mice peritoneal cavity.

**Table S1.** Surface markers of each particular cell type

| cell types                                                                   | full name                                                                 | Phenotype                                                                                                                           |
|------------------------------------------------------------------------------|---------------------------------------------------------------------------|-------------------------------------------------------------------------------------------------------------------------------------|
| G-MDSCs                                                                      | Granulocytic myeloid-derived suppressive cells                            | CD45 <sup>+</sup> CD11b <sup>+</sup> Ly6G <sup>+</sup> Ly6C <sup>-</sup> MHCII <sup>-</sup><br>CD86 <sup>-</sup>                    |
| M-MDSCs                                                                      | Monocytic myeloid-derived suppressive cells                               | CD45 <sup>+</sup> CD11b <sup>+</sup> Ly6G <sup>-</sup> Ly6C <sup>+</sup> MHCII <sup>-</sup><br>SSC <sup>low</sup>                   |
| TINs                                                                         | Tumor-infiltrating neutrophils                                            | CD45 <sup>+</sup> CD11b <sup>+</sup> Ly6G <sup>+</sup> MHCII <sup>+</sup> CD86 <sup>+</sup>                                         |
| Activated Neutrophils                                                        | Activated Neutrophils                                                     | CD45 <sup>+</sup> CD11b <sup>+</sup> Ly6G <sup>+</sup> MHCII <sup>+</sup> CD86 <sup>mid</sup>                                       |
| DCs                                                                          | Dendritic cells                                                           | CD45 <sup>+</sup> CD11b <sup>+</sup> CD11c <sup>+</sup>                                                                             |
| NK                                                                           | Natural killer cells                                                      | CD45 <sup>+</sup> CD11b <sup>+</sup> NK1.1 <sup>+</sup> Ly6G <sup>-</sup> Ly6C <sup>-</sup><br>F4/80 <sup>-</sup>                   |
| M1                                                                           | Type 1 tumor associated macrophages                                       | CD45 <sup>+</sup> CD11b <sup>+</sup> F4/80 <sup>+</sup> Ly6G <sup>-</sup> Ly6C <sup>-</sup><br>MHCII <sup>+</sup> CD86 <sup>+</sup> |
| TAMs                                                                         | tumor associated macrophages                                              | CD45 <sup>+</sup> CD11b <sup>+</sup> F/80 <sup>+</sup> Ly6G <sup>-</sup> Ly6C <sup>-</sup>                                          |
| CD86 <sup>+</sup> MHCII <sup>+</sup> QNs                                     | CD86 <sup>+</sup> MHCII <sup>+</sup> Quiescent neutrophils                | CD45 <sup>+</sup> MHCII <sup>+</sup> CD86 <sup>+</sup> CD11b <sup>-</sup> Ly6G <sup>+</sup>                                         |
| QNs                                                                          | Quiescent neutrophils                                                     | CD45 <sup>+</sup> CD11b <sup>-</sup> Ly6G <sup>+</sup>                                                                              |
| CD86 <sup>+</sup> MHCII <sup>+</sup> CD11b <sup>-</sup><br>Ly6G <sup>-</sup> | CD86 <sup>+</sup> MHCII <sup>+</sup> CD11b <sup>-</sup> Ly6G <sup>-</sup> | CD45 <sup>+</sup> CD86 <sup>+</sup> MHCII <sup>+</sup> CD11b <sup>-</sup> Ly6G <sup>-</sup>                                         |
| CD11b <sup>-</sup> Ly6G <sup>-</sup>                                         | CD11b <sup>-</sup> Ly6G <sup>-</sup>                                      | CD45 <sup>+</sup> CD11b <sup>-</sup> Ly6G <sup>-</sup>                                                                              |
| Granulocytes                                                                 | Granulocytes                                                              | CD45 <sup>+</sup> CD11b <sup>+</sup> Ly6G <sup>+</sup>                                                                              |
| Monocytes                                                                    | Monocytes                                                                 | CD45 <sup>+</sup> CD11b <sup>+</sup> Ly6G <sup>-</sup>                                                                              |
| CD45                                                                         | Leukocytes                                                                | CD45 <sup>+</sup>                                                                                                                   |
